# Supplementary material for: Effect of flubendazole on developing stages of Loa loa in vitro and in vivo: a new approach for screening filaricidal agents
Source: PubMed Central journal article supplement (PMC6323797; doi:10.1186/s13071-018-3282-x), 2019-01-08

### Hydrolyzed flubendazole

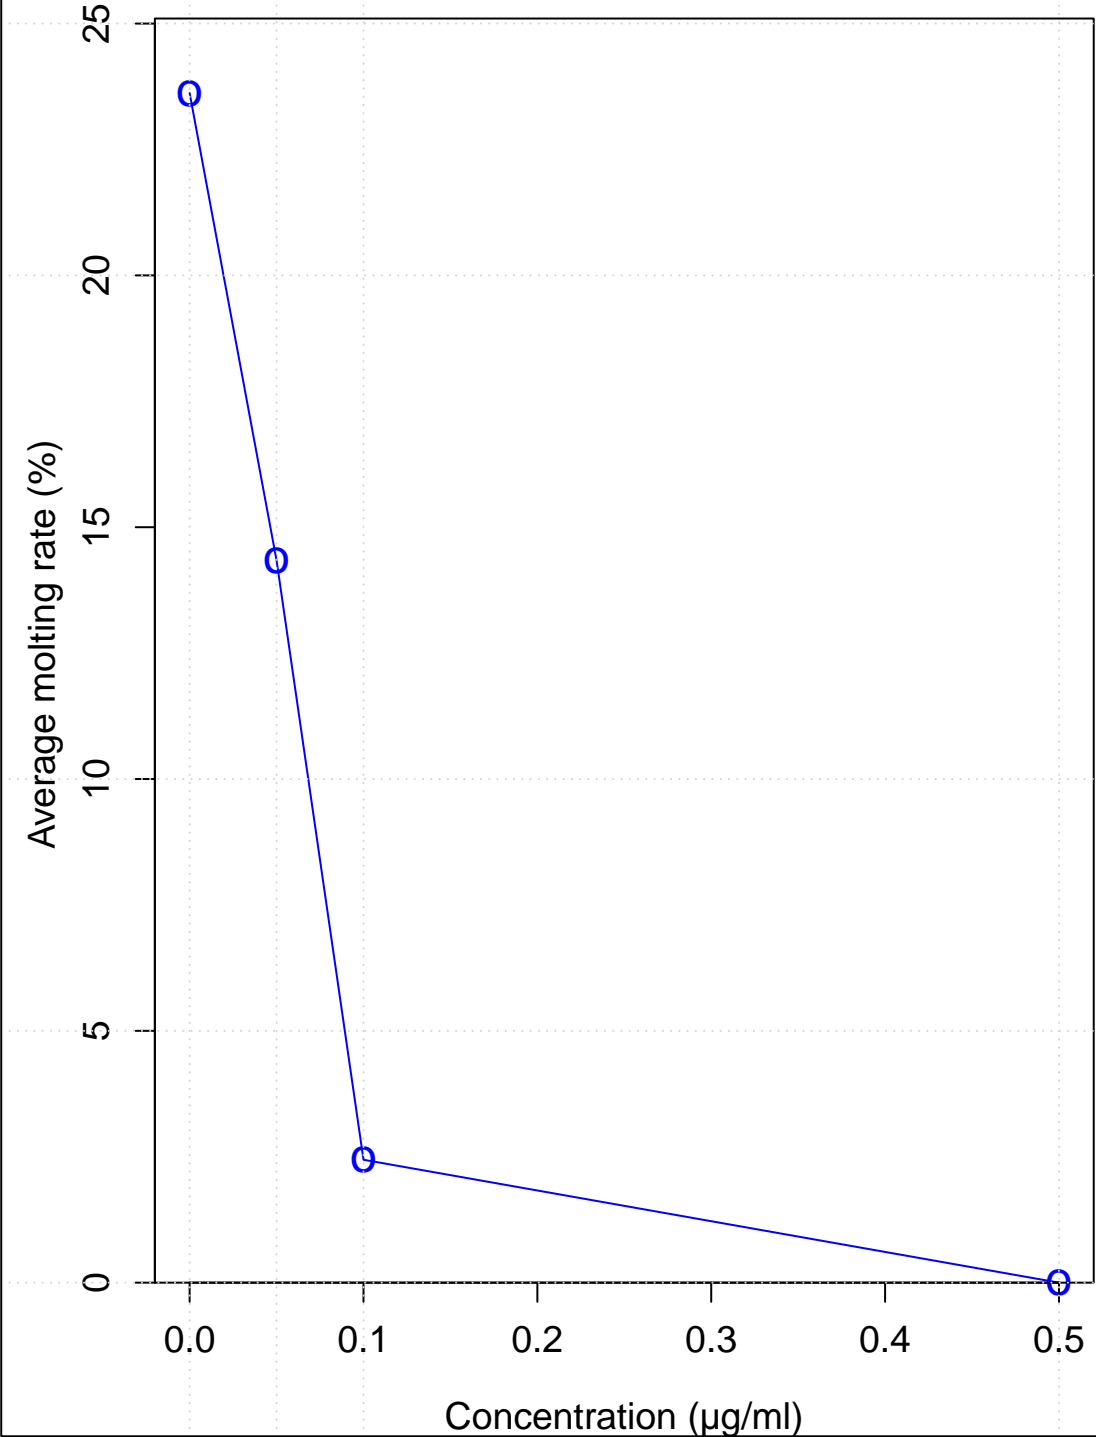

Supplement: 13071_2018_3282_MOESM3_ESM.pdf [file 13071_2018_3282_MOESM3_ESM.pdf]
